# Supplementary material for: Cost-effectiveness analysis of integrated community case management delivery models utilizing drug sellers and community health workers for treatment of under-five febrile cases of malaria, pneumonia, diarrhoea in rural Uganda
Source: Springer Nature journal article supplement (doi:10.1186/s12936-021-03944-3), 2021-10-18
Supplement: MOESM1 [file 19768528]

**Additional file 1. Probabilities associated with chance nodes of the decision tree analytic model.**

| Parameter                                                                              | Values                        |                               | Source |
|----------------------------------------------------------------------------------------|-------------------------------|-------------------------------|--------|
|                                                                                        | iCCM-trained                  | Not iCCM-trained              |        |
| <b>Drug sellers</b>                                                                    |                               |                               |        |
| Probability of seeking care from iCCM trained- drug sellers vs untrained               | 0.524                         | 0.476                         | [39]   |
| Proportion of U5s with malaria vs diarrhea vs pneumonia                                | 0.624 vs<br>0.138 vs<br>0.238 | 0.624 vs<br>0.138 vs<br>0.238 | [3]    |
| Proportion of U5 with suspected malaria tested with mRDT tested                        | 0.877                         | 0                             | [39]   |
| Proportion of febrile U5 tested with mRDT that were positive                           | 0.75                          | 0.75                          | [39]   |
| Proportion of U5s who received ACT given positive mRDT                                 | 1                             | 0                             | [39]   |
| The proportion of U5s who received ACT given negative mRDT                             | 0.091                         | 0                             | [39]   |
| The proportion of U5s who received ACT given that they were not tested with mRDT       | 0.213                         | 0.536                         | [6]    |
| The proportion of U5s diagnosed with diarrhea with loose non-bloody                    | 1                             | 1                             | [39]   |
| The proportion of U5s who received ORS+Zn given that they had loose non-bloody stools  | 0.773                         | 0.05                          | [39]   |
| The proportion of U5s who received ORS+Zn given that they had normal stools            | 0                             | 0                             | [39]   |
| The proportion of U5s with suspected pneumonia that had their respiratory rate counted | 0.548                         | 0                             | [39]   |
| Prevalence of fast breathing rate                                                      | 0.833                         | 0.833                         | [39]   |
| The proportion of U5s who received amoxicillin given a fast breathing rate             | 0.96                          | 0                             | [39]   |
| The proportion of U5s with a normal breathing rate that was given amoxicillin          | 0                             | 0                             | [39]   |
| The proportion of U5 who received amoxicillin without respiratory rate being counted   | 0.260                         | 0.267                         | [39]   |

|                                                                                        | CHWs                          |                               |      |
|----------------------------------------------------------------------------------------|-------------------------------|-------------------------------|------|
| Probability of seeking care from iCCM trained CHW vs untrained CHW                     | 0.4                           | 0.6                           | [12] |
| Proportion of U5s with malaria vs diarrhea vs pneumonia                                | 0.624 vs<br>0.138 vs<br>0.238 | 0.624 vs<br>0.138 vs<br>0.238 | [3]  |
| The proportion of U5 with suspected malaria tested with mRDT tested                    | 0.872                         | 0                             | [40] |
| The proportion of febrile U5 tested with mRDT that were positive                       | 0.75                          | 0.75                          |      |
| The proportion of U5s who received ACT given positive mRDT                             | 0.941                         | 0                             | [41] |
| The proportion of U5s who received ACT given negative mRDT                             | 0.109                         | 0                             | [41] |
| The proportion of U5s who received ACT given that they were not tested with mRDT       | 0.078                         | 0                             | [40] |
| The proportion of U5s diagnosed with diarrhea with loose non-bloody                    | 1                             | 0                             | [40] |
| The proportion of U5s who received ORS+Zn given that they had loose non-bloody stools  | 0.24                          | 0                             | [12] |
| The proportion of U5s who received ORS+Zn given that they had normal stools            | 0                             | 0                             |      |
| The proportion of U5s with suspected pneumonia that had their respiratory rate counted | 0.852                         | 0                             | [40] |
| Prevalence of fast breathing rate                                                      | 0.833                         | 0.883                         |      |
| The proportion of U5s who received amoxicillin given a fast breathing rate             | 0.947                         | 0                             | [41] |
| The proportion of U5s with a normal breathing rate that was given amoxicillin          | 0.19                          | 0                             | [33] |
| The proportion of U5 who received amoxicillin without respiratory rate being counted   | 0.078                         | 0                             | [40] |
